# Supplementary material
Source: publisher figshare collection journal article supplement (https://frontiersin.figshare.com/ndownloader/files/12981425)
Supplement: Supplementary file 1 [file 12981425]

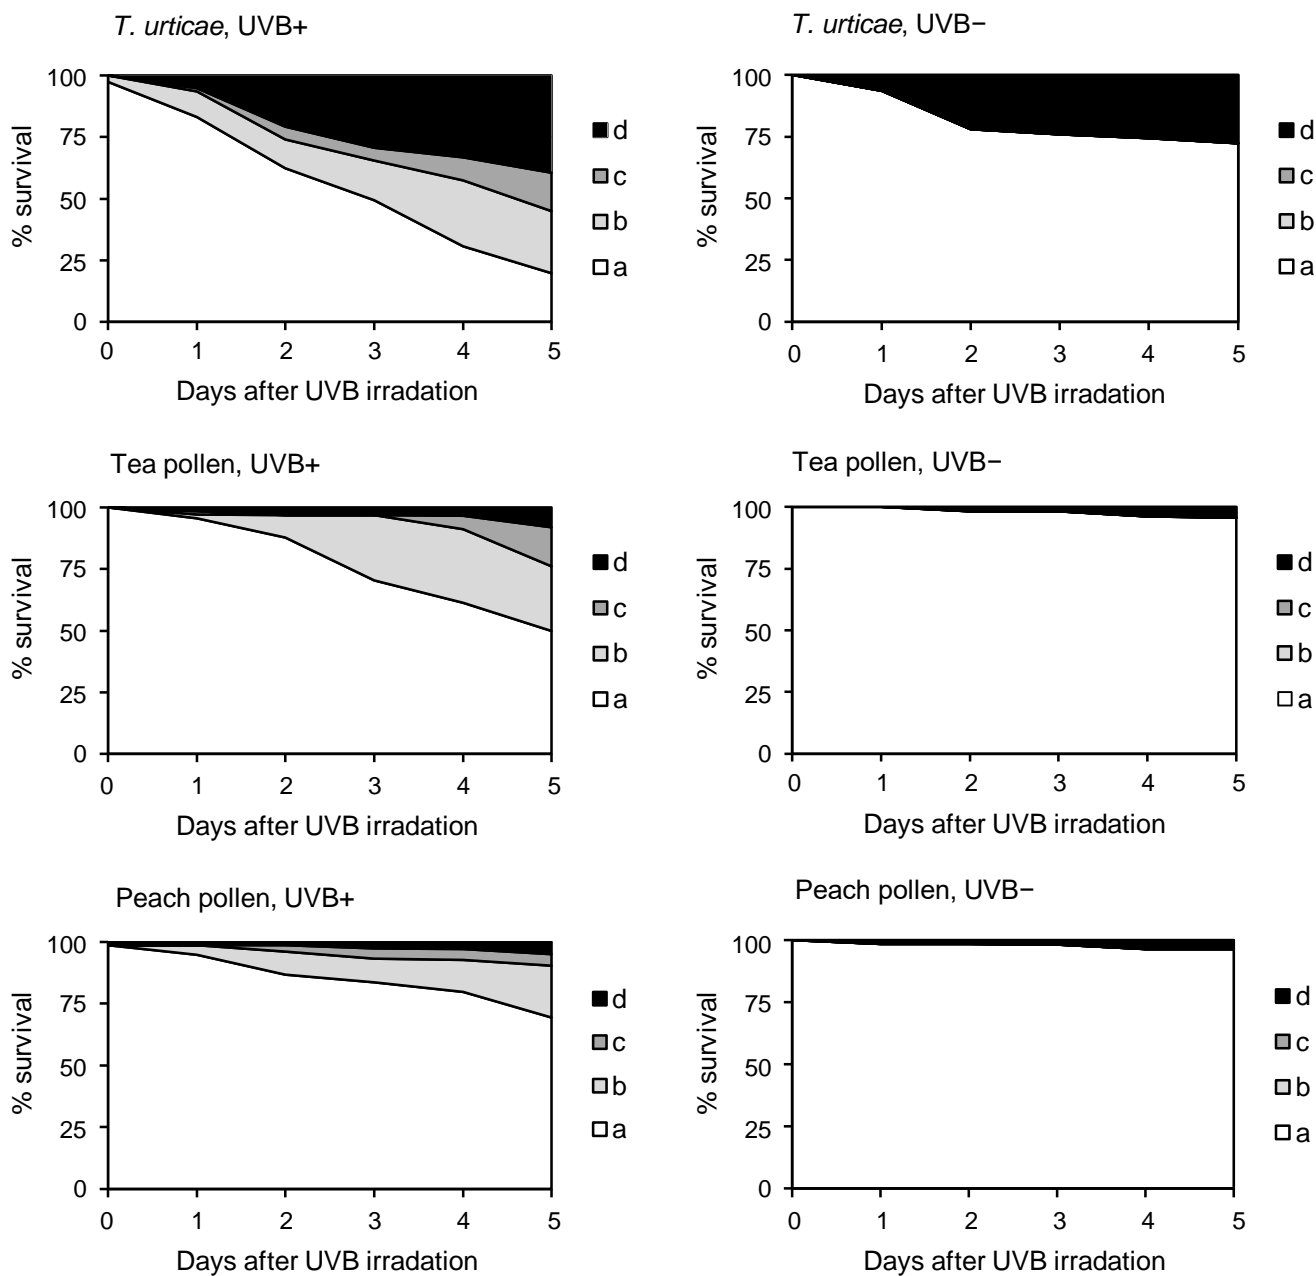

Figure S3. Effects of prey mite (*Tetranychus urticae*), tea pollen and peach pollen on survival curves of *Neoseiulus californicus* adult females after irradiation with UVB at 7.72 kJ m<sup>-2</sup>. UVB+: irradiated with UVB, UVB-: unirradiated control.
